# Supplementary material for: Synthesis of soluble melanin nanoparticles under acidic conditions using Burkholderia cepacia tyrosinase and their characterization
Source: Royal Society of Chemistry journal article supplement (doi:10.1039/d2ra01276f), 2022-01-01
Supplement: d2ra01276f1.pdf [file d2ra01276f1.pdf]

1 **Supporting Information**

2 **Synthesis of soluble melanin nanoparticles under acidic condition using *Burkholderia***

3 ***cepacia* tyrosinase and their characterization**

4  
5 Hyun Kim<sup>1,2</sup>, Uk-Jae Lee<sup>1,2</sup>, Hanbit Song<sup>1,2</sup>, Jeongchan Lee<sup>1,2</sup>, Won-Suk Song<sup>1,2</sup>, Heewon Noh<sup>1,2</sup>,  
6 Min-Ho Kang<sup>1,6</sup>, Beom-Seok Kim<sup>3</sup>, Jungwon Park<sup>1,6</sup>, Nathaniel S. Hwang<sup>1</sup>, and Byung-Gee  
7 Kim<sup>1,2,3,4,5\*</sup>

8  
9 <sup>1</sup>School of Chemical and Biological Engineering, Seoul National University, Seoul, 08826,  
10 Republic of Korea

11 <sup>2</sup>Institute of Molecular Biology and Genetics, Seoul National University, Seoul, 08826, Republic  
12 of Korea

13 <sup>3</sup>Interdisciplinary Program for Biochemical Engineering and Biotechnology, Seoul National  
14 University, Seoul, 08826, Republic of Korea

15 <sup>4</sup>Bio-MAX/N-Bio, Seoul National University, Seoul, 08826, Republic of Korea

16 <sup>5</sup>Institute for Sustainable Development (ISD), Seoul National University, Seoul, 08826, Republic  
17 of Korea

18 <sup>6</sup>Center for Nanoparticle Research, Institute for Basic Science (IBS), Seoul 08826, Republic of  
19 Korea

20

21 **Table S1.** Primer list

| <b>Primer</b>             | <b>Sequence (5' → 3')</b>             |
|---------------------------|---------------------------------------|
| <i>BcTy_F</i>             | GGAGATATACCATGGCAAATAACGCATCTGGAGTCAG |
| <i>BcTy_R</i>             | CGGCGGCAAGCTTTCGGACCTCGAGCCGGA        |
| <i>BcTy-pET28a-CPEC_F</i> | GTCCGAAAGCTTGCGGCCG                   |
| <i>BcTy-pET28a-CPEC_R</i> | AGATGCGTTATTTGCCATGGTATATCTCC         |

22

23

|                                                                                | Optimum<br>pH | Substrate  | $V_{\max}$<br>( $\mu\text{mol}\cdot\text{min}^{-1}\cdot\text{mg}^{-1}$ ) | $K_m$<br>(mM)     | $k_{\text{cat}}$<br>( $\text{s}^{-1}$ ) | $k_{\text{cat}}/K_m$<br>( $\text{mM}\cdot\text{s}^{-1}$ ) |
|--------------------------------------------------------------------------------|---------------|------------|--------------------------------------------------------------------------|-------------------|-----------------------------------------|-----------------------------------------------------------|
| <i>Agaricus bisporus</i> Ty<br>(Fenoll,<br>Rodríguez-<br>López et al.<br>2001) | 6             | L-Tyrosine | 10.8                                                                     | $0.25 \pm 0.03$   | $7.9 \pm 0.12$                          | 31.60                                                     |
|                                                                                |               | L-DOPA     | 145.9                                                                    | $0.28 \pm 0.01$   | $107.3 \pm 1.45$                        | 383.21                                                    |
| <i>Bacillus megaterium</i><br>Ty<br>(Deri,<br>Kanteev et al.<br>2016)          | 8             | L-Tyrosine | $3.62 \pm 0.06$                                                          | $0.082 \pm 0.006$ | 2.1                                     | 25.60                                                     |
|                                                                                |               | L- DOPA    | $30.3 \pm 0.6$                                                           | $0.24 \pm 0.02$   | 17.8                                    | 74.20                                                     |
| <i>Streptomyces avermitilis</i> Ty<br>(Lee, Lee et<br>al. 2015)                | 7             | L-Tyrosine | $1.05 \pm 0.037$                                                         | $0.589 \pm 0.056$ | 0.021                                   | 0.04                                                      |
|                                                                                |               | L- DOPA    | $9.67 \pm 1.85$                                                          | $2.79 \pm 0.79$   | 0.19                                    | 0.07                                                      |
| <i>Burkholderia thailandensis</i><br>Ty<br>(Son, Lee,<br>Lee et al.<br>2018)   | 5             | L-Tyrosine | $404.24 \pm 18.88$                                                       | $0.59 \pm 0.055$  | 397.5                                   | 668.63                                                    |
|                                                                                |               | L- DOPA    | $495.42 \pm 44.66$                                                       | $0.83 \pm 0.13$   | 487.17                                  | 586.74                                                    |
| <i>Burkholderia cepacia</i> Ty<br>(This study)                                 | 4             | L-Tyrosine | $335.58 \pm 31.49$                                                       | $0.22 \pm 0.04$   | $333.9 \pm 31.33$                       | 1504.94                                                   |
|                                                                                |               | L- DOPA    | $1812.12 \pm 299.35$                                                     | $2.16 \pm 0.41$   | $1803.06 \pm 297.9$                     | 835.42                                                    |

24 **Table S2.** Kinetic parameters of tyrosinases (Ty).

25 *Note.* DOPA: dihydroxyphenylalanine

26

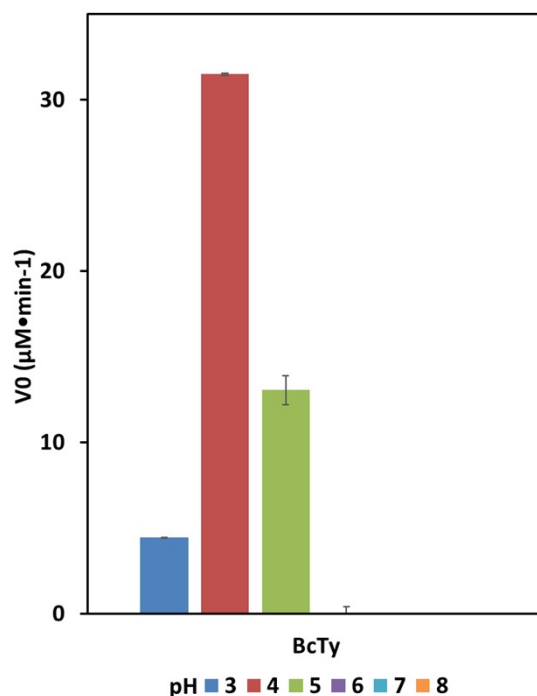

27

28 **Figure S1.** Optimal pH of *BcTy* activity. Assay was performed by measure a conversion of l-  
 29 tyrosine by *BcTy* under each 50 mM buffer (pH 3.0, 4.0, 5.0: citric buffer, pH 6.0, 7.0: phosphate  
 30 buffer, pH 8.0: Tris buffer). For the assay, 100  $\mu\text{l}$  of 400nM *BcTy* solution with 10  $\mu\text{M}$  of  $\text{CuSO}_4$   
 31 was mixed with 100  $\mu\text{l}$  of 2 mM L-tyrosine solution. The total reaction volume was 200  $\mu\text{l}$  at  
 32 37°C. For initial velocity measurements, UV absorption at 475 nm ( $\epsilon = 3600 \text{ M}^{-1}\text{cm}^{-1}$ ) was  
 33 recorded every 1 min by a UV spectrometer for a total of 30 min. The initial velocity of *BcTy*  
 34 ( $V_0$ ) was calculated by plotting the initial 5 points of the response, based on the triplet set of the  
 35 experiment.

36

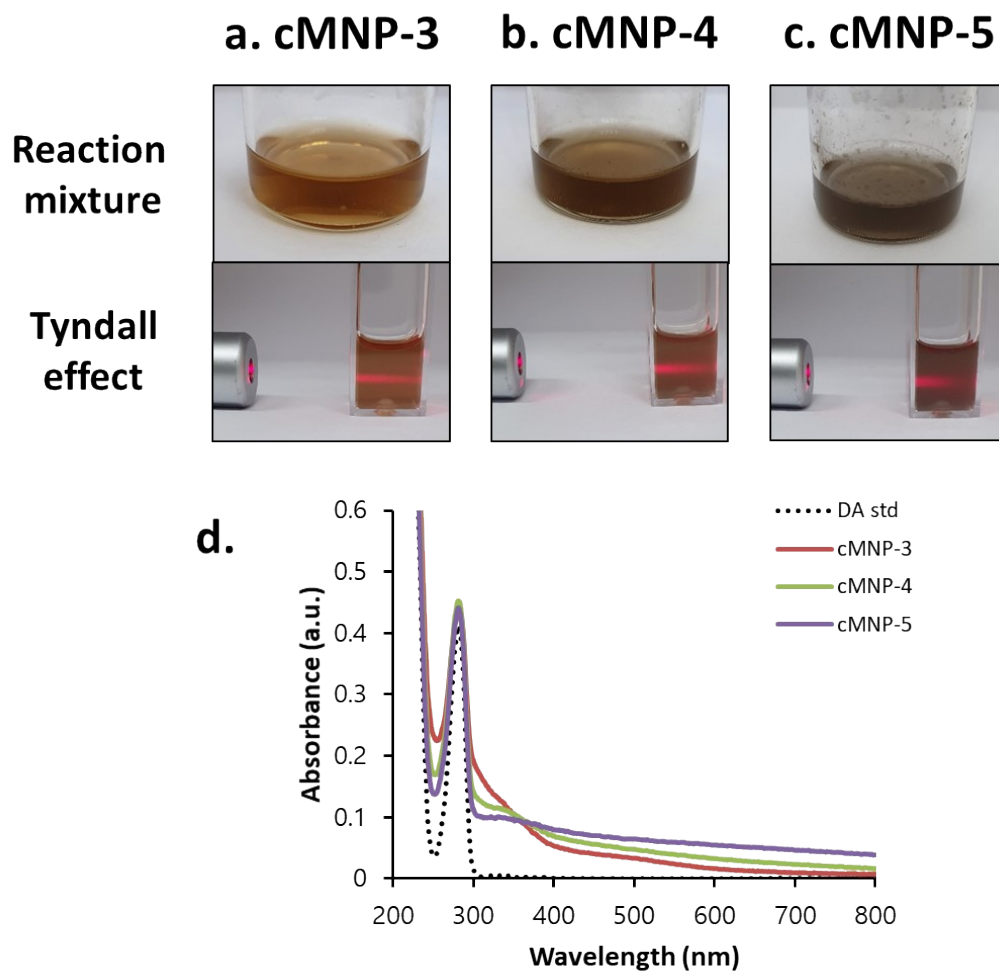

37

38 **Figure. S2** Digital pictures of melanin reaction solutions and Tyndall effect by irradiating 660  
 39 nm red laser synthesized from 1 mg/ml of dopamine using various synthesis methods and their  
 40 scanning electron microscopy images; (a) pH 3.0 - APS, (b) pH 4.0 - APS, (c) pH 5.0 – APS. (d)  
 41 UV spectrum profile of cMNP-3, 4, and 5. The black dot line represents the dopamine 3 mg/ml  
 42 standard dissolved in DW. The samples for UV sepctrum were diluted with water from 3 mg/ml  
 43 to 0.05 mg/ml.

44

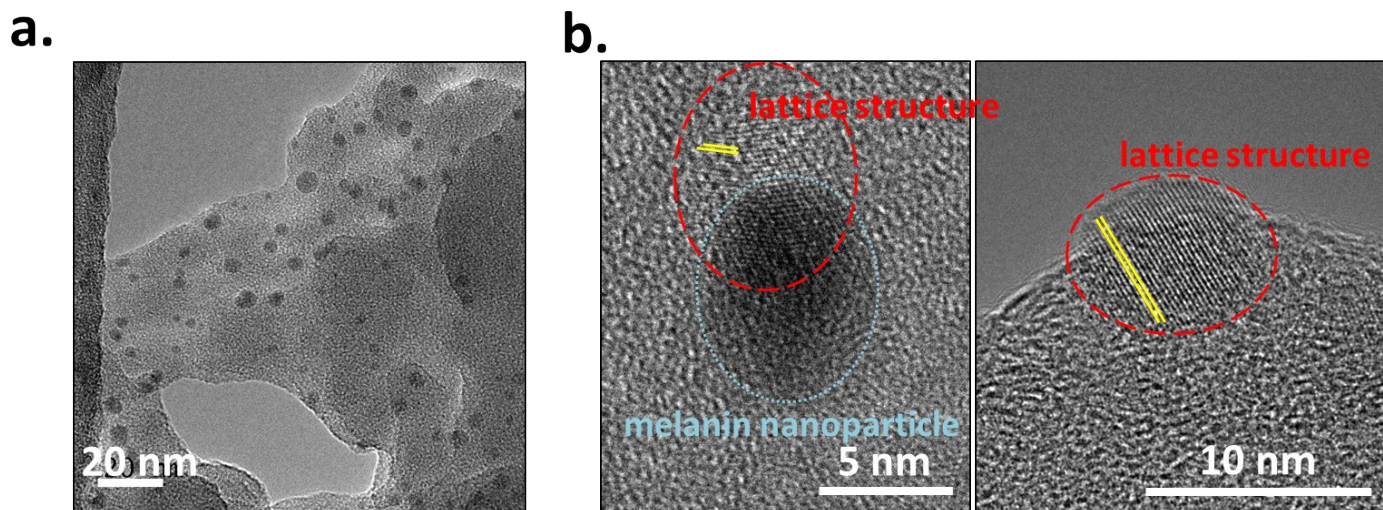

45

46 **Figure. S3** TEM image of (a) eMNP-3 and (b) Nano-onion like stacking structure of eMNP-3. The  
47 blue dot line represents melanin nanoparticles, and the red dot line shows the corresponding onion-  
48 like stacking structure. The length of each gap between the lattice is approximately 0.3 nm (Yellow  
49 line shows the gap between lattice.).

50

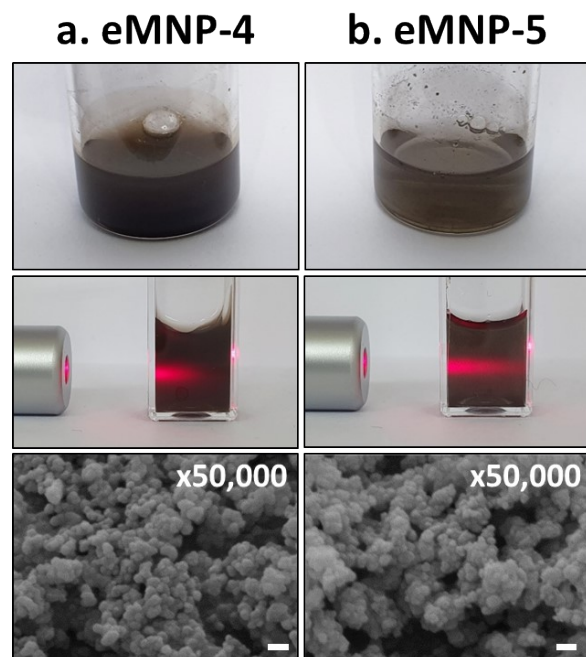

51

52 **Figure. S4** Digital picture of melanin reaction solution and Tyndall effect by irradiating 660 nm  
 53 red laser synthesized from 3 mg/ml of dopamine at acidic conditions. And their scanning electron  
 54 microscopy image; (a) pH 4 - *BcTy*, (b) pH 5 - *BcTy*. Scale bar: 200 nm. Average hydrodynamic  
 55 diameters of (a) eMNP-4 and (b) eMNP-5 measured by DLS. The sample for the tyndall effect and  
 56 DLS was diluted with water from 3 mg/ml to 0.05 mg/ml.

57

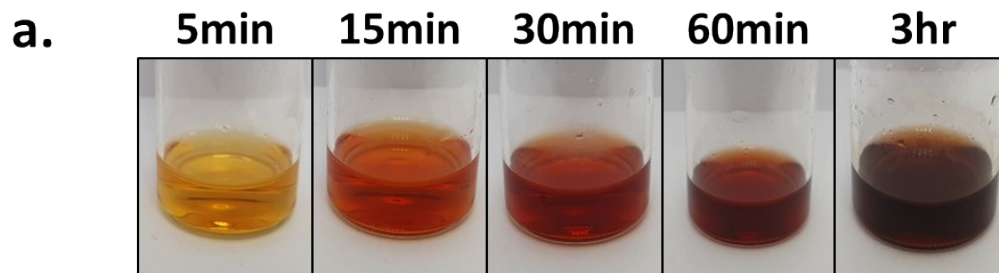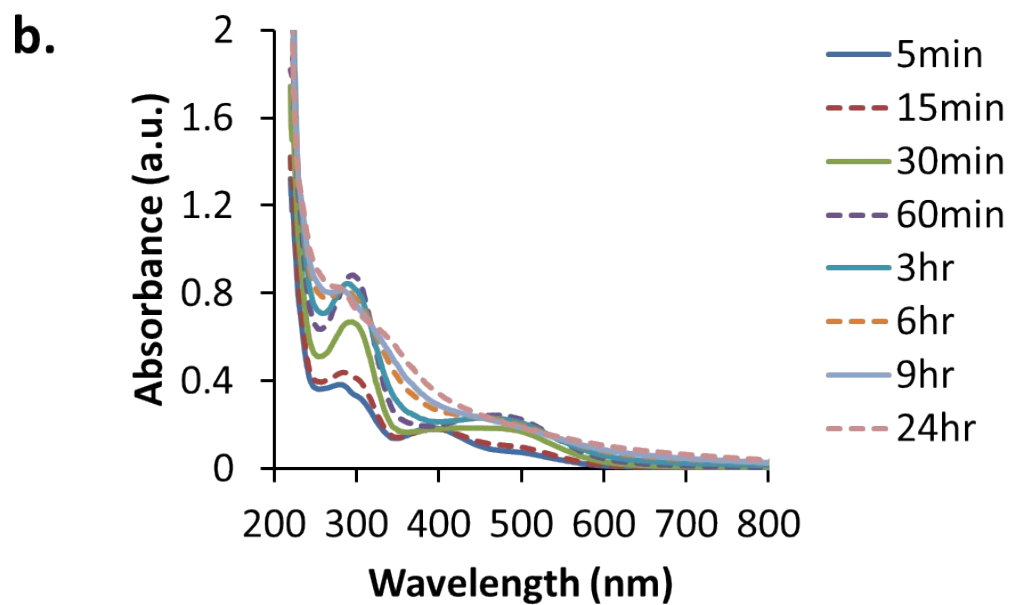

59

60 **Figure. S5** (a) Time point image of eMNP-3 reaction solution. (b) UV spectrum profile (220 –  
61 1000 nm) change of the eMNP-3 reaction mixture over time and representative digital picture  
62 corresponding to each time points

63



**a.**

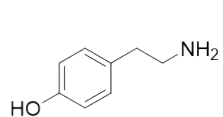

**1:** tyramine

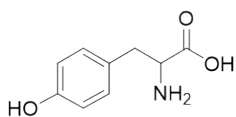

**4:** tyrosine

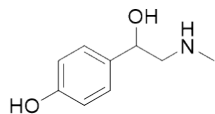

**2:** synephrine

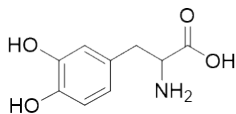

**5:** 3,4-dihydroxyphenylalanine (DOPA)

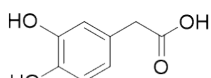

**3:** 3,4-dihydroxyphenylacetic acid (DOPAC)

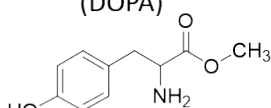

**6:** Tyrosine methylester (TME)

**b.**

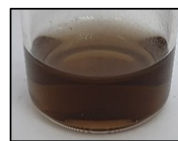

**1**

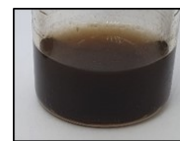

**4**

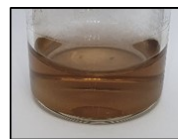

**2**

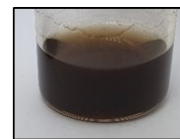

**5**

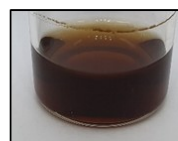

**3**

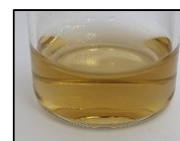

**6**

64

65 **Figure. S6** (a) Chemical structure of eMNP substrates based on the phenolic compound and (b)  
66 representative digital image of produced soluble eMNPs.

67

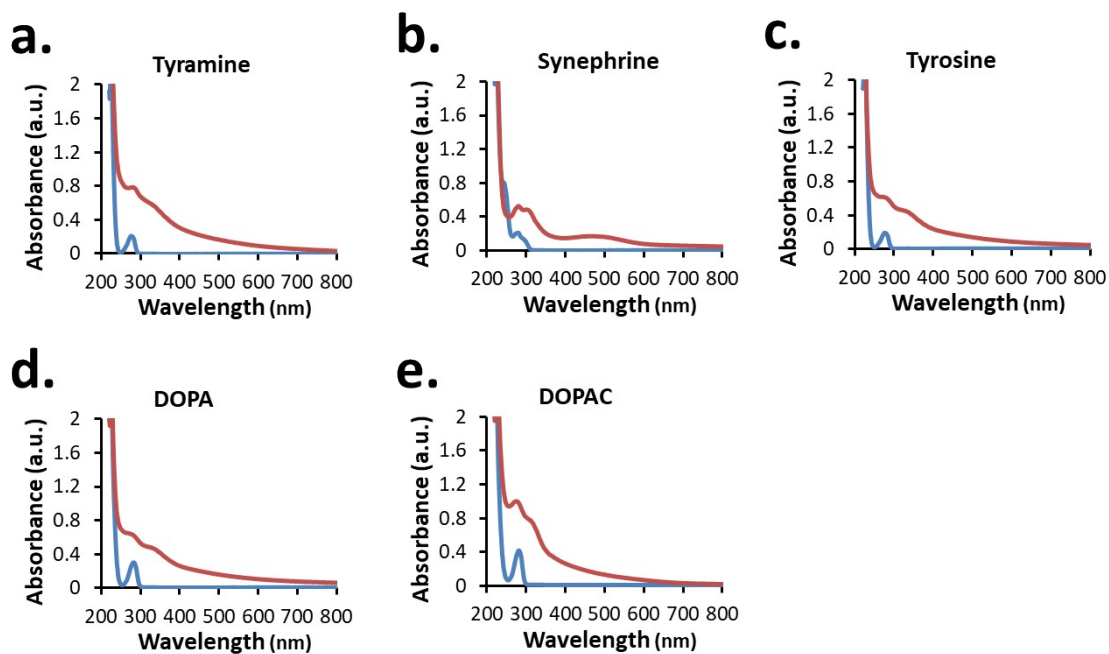

68

69 **Figure. S7** UV spectrum profile between eMNP synthesized according to substrate variation - (a)  
 70 tyramine, (b) synephrine, (c) tyrosine, (d) DOPA, (e) DOPAC - and substrate standard. Blue line  
 71 indicates substrate standards; red line indicates eMNPs. All sample were diluted with water from  
 72 3 mg/ml to 0.05 mg/ml before UV spectroscopy.

73

| Chemical structure                                                                | m/z           |
|-----------------------------------------------------------------------------------|---------------|
| 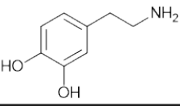 | <b>154.09</b> |
|  | <b>152.07</b> |
|  | <b>273.20</b> |

| Chemical structure                                                                 | m/z           |
|------------------------------------------------------------------------------------|---------------|
| 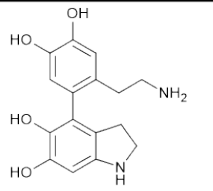 | <b>305.34</b> |
|  | <b>152.07</b> |
|  | <b>273.20</b> |

74

75 **Figure. S8** The predicted chemical structure of dopamine oligomeric derivatives using positive

76 mode of MALDI-TOF

**a.**

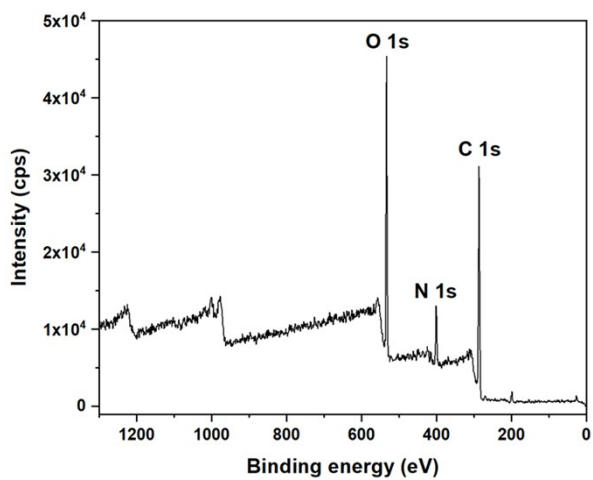

77

**b.**

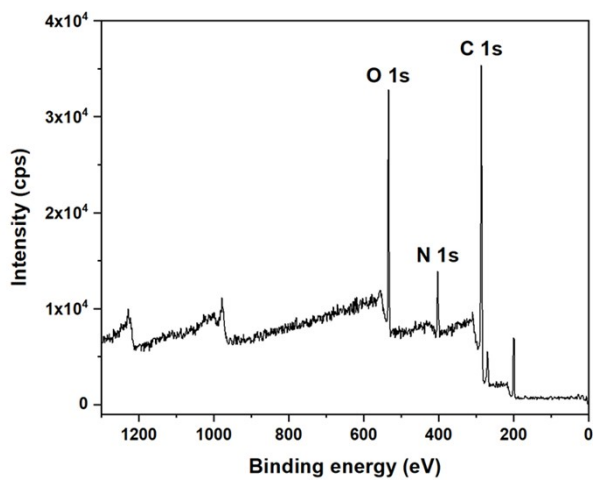

78 **Figure. S9** XPS survey spectrum of (a) eMNP-3 and (b) cMNP

79

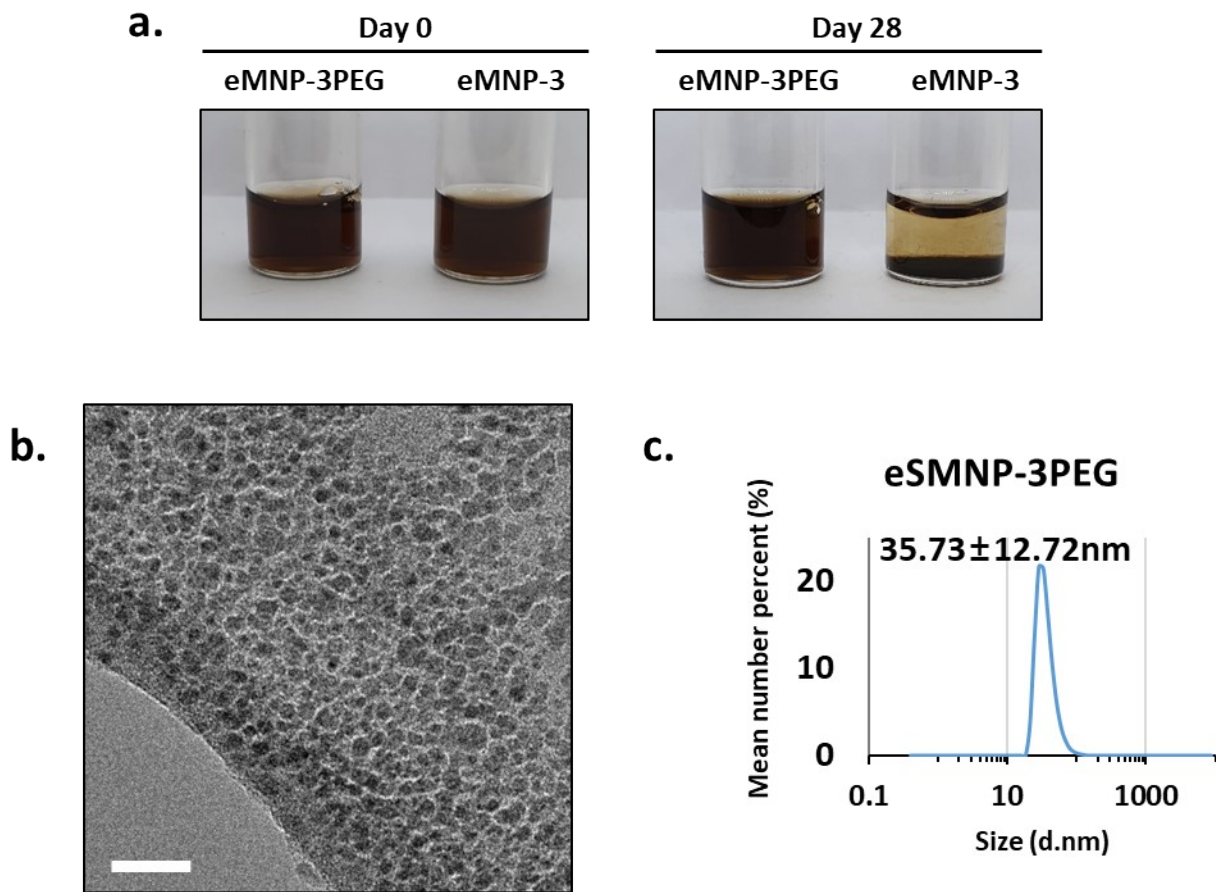

80

81 **Figure. S10** Surface modification of soluble eMNP. (a) PEG-modified eMNP (eMNP-3PEG)  
 82 stably dispersed in phosphate-buffered saline (PBS) over 4 weeks. (b) TEM image and (c)  
 83 hydrodynamic diameter of eMNP-3PEG. Scale bar: 20 nm. The sample was diluted with water  
 84 from dopamine concentration of 3 mg/ml to 0.05 mg/ml.

85

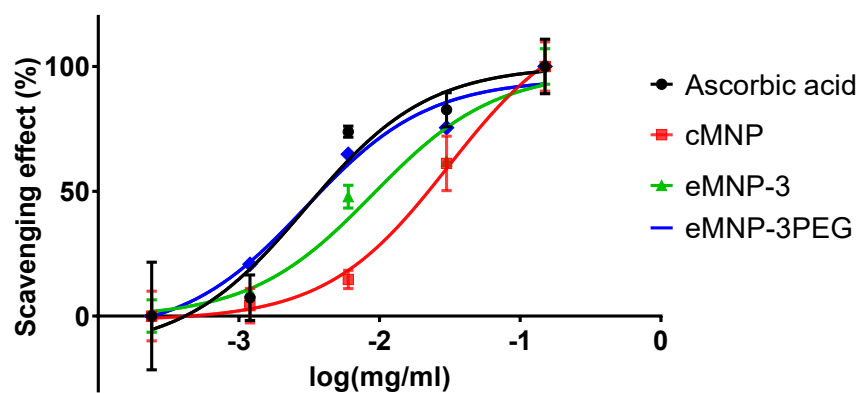

86

87 **Figure. S11** Comparison of radical scavenging activity (%) between MNPs and ascorbic acid. The  
 88 antioxidant activity of eMNP was measured in PBS buffer (pH 7.4) to mimic the physiological  
 89 condition with  $EC_{50}$  for the antioxidant activity required to reduce the concentration of 0.1 mM  
 90 DPPH, a free radical generator, by 50%.

91

a.

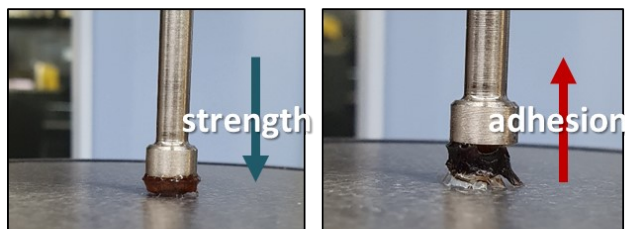

b.

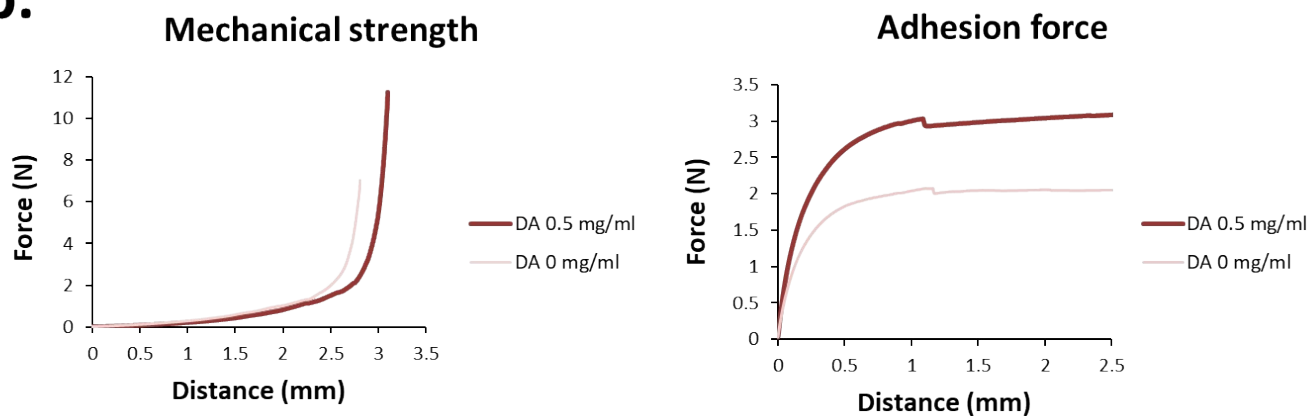

92

93 **Figure. S12** (a) Schematic image of the mechanical strength and adhesion force of melanin

94 hydrogel. (b) Representative stress-strain curve
